# Supplementary material
Source: PubMed Central journal article supplement (PMC6908308)
Supplement: NIHMS912318-supplement-supplement_1.pdf [file NIHMS912318-supplement-supplement_1.pdf]

Online Resource 1. Biochemical Parameters in the CSHS cohort and published CSHS reports

|                                                                           | <b>Subject<br/>(CSHS#<br/>or author,<br/>age<br/>(years),<br/>sex)</b> | <b>Blood<br/>phosphate</b> | <b>Blood<br/>FGF23*</b> | <b>Alkaline<br/>phosphatase</b> | <b>25-OH-<br/>Vitamin<br/>D</b> | <b>1,25-OH<sub>2</sub>-<br/>Vitamin D</b> | <b>TRP or<br/>TmP/GFR</b>                 | <b>Blood<br/>calcium</b>         | <b>PTH</b>             | <b>Primary<br/>renal<br/>tubulopathy</b> | <b>Ref.</b> |
|---------------------------------------------------------------------------|------------------------------------------------------------------------|----------------------------|-------------------------|---------------------------------|---------------------------------|-------------------------------------------|-------------------------------------------|----------------------------------|------------------------|------------------------------------------|-------------|
| Subjects<br>from the<br>CSHS<br>cohort                                    | CSHS101,<br>6/F                                                        | 2.6 mg/dl<br>(4-5.4)       | 445 pg/ml<br>(10-50)    | 308 U/L<br>(96-297)             | 29 ng/ml<br>(33-100)            | 8 pg/ml<br>(24-86) ↓                      | TRP 72%                                   | 2.4<br>mmol/L<br>(2.15-<br>2.55) | 15.9 pg/ml (15-65)     | No                                       | N/A         |
|                                                                           | CSHS102,<br>12/F                                                       | 2.3 mg/dl<br>(3.3-5.4)     | 279 RU/ml<br>(<150)     | 366 U/L<br>(70-280)             | 24ng/ml<br>(33-100)             | NR                                        | LOW                                       | 9.7 mg/dl<br>(8.8-10.8)          | 47 pg/ml<br>(8.5-72.5) | No                                       | N/A         |
|                                                                           | CSHS104,<br>3/F                                                        | 1.5 mg/dl<br>(3.9-6.5)     | 795 RU/ml<br>(<150)     | 1085 U/L<br>(108-317)           | 17 ng/ml<br>(10-80)             | 10 pg/ml<br>(24-86)                       | TRP 80%                                   | 2.1<br>mmol/L<br>(2.15-<br>2.55) | 67 pg/ml (15-65)       | No                                       | N/A         |
|                                                                           | CSHS105,<br>16/M                                                       | 2.6 mg/dl<br>(2.8-4.6)     | 74 pg/ml<br>(10-50)     | 283 U/L<br>(52-171)             | 27 ng/ml<br>(33-100)            | 69 pg/ml<br>(24-86)                       | TRP 84%                                   | 2.2<br>mmol/L<br>(2.15-<br>2.55) | 47 pg/ml (15-65)       | No                                       | N/A         |
|                                                                           | CSHS106,<br>13/F                                                       | 1.3 mg/dl<br>(3.3-5.4)     | 176 pg/ml<br>(10-50)    | 1186 U/L<br>(50-162)            | 19 ng/ml<br>(33-100)            | 37 pg/ml<br>(24-86)                       | TRP 79%                                   | 2.3<br>mmol/L<br>(2.15-<br>2.55) | 52 pg/ml (15-65)       | No                                       | N/A         |
| Subjects<br>from the<br>literature<br>in whom<br>FGF23<br>was<br>assessed | Narazaki<br>et al. 5/F                                                 | 2.1mg/dL<br>(3.8-5.8)      | 123 pg/ml<br>(10-50)    | 1935 U/L<br>(330-880)           | 16 pg/ml                        | 32 pg/ml<br>(20-40)                       | TmP/GFR<br>1.9mg/dl<br>(4.7-5.6)          | 9.9 mg/dL                        | 61 pg/mL (15-65)       | NR                                       | [1]         |
|                                                                           | Sethi et al.<br>5/M                                                    | 2.1 mg/dl<br>(3.5-5.5)     | 1265 pg/ml<br>(10-50)   | NR                              | 55nMol/L<br>(>50)               | NR                                        | TmP/GFR<br>1.5mg/dl<br>(2.9-4.6<br>mg/dl) | 10.9mg/dl<br>(9-11)              | 338 pg/ml (10-60)      | No                                       | [2]         |
|                                                                           | Lim et al.<br>CSHS 103<br>15/F                                         | 1.5mg/dl<br>(3.3-5.4)      | 524 RU/ml<br>(<150)     | 651 U/L (30-<br>120)            | LOW                             | NR                                        | LOW                                       | 9.3 mg/dl<br>(9-10.5)            | 90 pg/ml (10-60)       | No                                       | [1]         |
|                                                                           | Hoffman<br>et al. 16/M                                                 | 1.9 mg/dl<br>(3.5-5.2)     | 530 RU/ml<br>(<150)     | 534 U/L                         | 36 (10-<br>55ng/nl)             | 48 pg/ml<br>(21-65)                       | TmP/GFR<br>1.6 mg/dl<br>(3.2±0.3)         | 9.8 (8.5-<br>10.2)               | 45 pg/ml (10-65)       | No                                       | [3]         |
|                                                                           | Aggarwal<br>et al. 10/M                                                | 2.1 mg/dl<br>(2.1-4.5)     | 171RU/ml<br>(<150)      | 2685 U/L<br>(240-840)           | 69ng/ml                         | NR                                        | TRP 73%                                   | 8.7(8.1-<br>10.4)                | 127.7 pg/ml            | No                                       | [4]         |
|                                                                           | Avitan-<br>Hersh et                                                    | 1.9 mg/dl<br>(3.6-5)       | 69pg/ml<br>(10-50)      | NR                              | 7ng/ml<br>(>30)                 | 21 pg/ml<br>(25-76)                       | TRP 96%                                   | 9.8 (8.5-<br>10.6)               | 62ng/L(15-65)          | No                                       | [5]         |

|                   |                        |                     |                       |                 |                  |                                   |                |                  |    |     |
|-------------------|------------------------|---------------------|-----------------------|-----------------|------------------|-----------------------------------|----------------|------------------|----|-----|
| al. 14/M          |                        |                     |                       |                 |                  |                                   |                |                  |    |     |
| Heike et al. 19/M | 2.2 mg/dl<br>(4.3-5.7) | 215 RU/ml<br>(<150) | 1103 U/L<br>(133-347) | 12 (13-67ng/ml) | 19 (27-71 pg/ml) | TmP/GFR<br>1.5 mg/dl<br>(2.5-4.2) | 9.4 (9.4-10.6) | 51 (11-47 pg/ml) | No | [6] |

|                                                                    | Subject (author, age (years), sex) | Serum phosphate         | Serum FGF23* | Alkaline phosphatase | 25-OH-Vitamin D       | 1,25-OH <sub>2</sub> -Vitamin D | TRP or TmP/GFR             | Serum calcium        | PTH                 | Primary renal tubulopathy | Ref  |
|--------------------------------------------------------------------|------------------------------------|-------------------------|--------------|----------------------|-----------------------|---------------------------------|----------------------------|----------------------|---------------------|---------------------------|------|
| <b>Subjects from the literature in whom FGF23 was not assessed</b> | Moreira et al. 1/F                 | 1.9mg/dl (3-6.5)        | NR           | 1192 U/L (54-280)    | normal                | NR                              | LOW                        | normal               | normal              | No                        | [7]  |
|                                                                    | Kishida et al. 7/F                 | 2.1 mg/dl (4.5-6.5)     | NR           | 270 U/I (<116)       | NR                    | NR                              | LOW                        | 9.8 mg/dl (8.5-10.5) | normal              | No                        | [8]  |
|                                                                    | Chou et al. 6/M                    | 1.5 mg/dl (3.7-5.6)     | NR           | 1041 U/L (145-420)   | 8.94 ng/ml (9.7-41.7) | NR                              | TRP 80%                    | 9.5 mg/dl (8.8-10.8) | 94.6 pg/ml(10-65)   | No                        | [9]  |
|                                                                    | Chou et al. 22/M                   | 1.5 mg/dl (2.9-5.4)     | NR           | 437 U/L (70-230)     | NR                    | NR                              | TRP 91%                    | 9.7mg/dl             | 35.3 (10-65)        | No                        | [9]  |
|                                                                    | Olivares et al. 2.5/F              | 0.4mmol/L (0.9-1.75)    | NR           | 350 U/L (37-200)     | 70 nmol/L (37-200)    | 21.6 pmol/L (35-105)            | TRP 42%                    | 9.2 mg/dl (8.8-10.8) | NR                  | No                        | [10] |
|                                                                    | Ivker et al. 1/F                   | 0.87 mmol/L (1.54-2.62) | NR           | 420 (U/L) (50-136)   | normal                | 36 nmol/L (36-144)              | TRP 68.5%                  | normal               | 28 ng/L (51-217)    | NR                        | [11] |
|                                                                    | Oranje et al. 4/M                  | 0.7 mmol/L (1-1.8)      | NR           | 453 U/L (80-225)     | 100umol/L (31-129)    | 46 nmol/L (40-140)              | TRP 86%                    | normal               | 2.2 pmol/L (0.8-15) | No                        | [12] |
|                                                                    | Tokatli et al. 5/M                 | 1.7 mg/dl               | NR           | 25 U/L               | NR                    | NR                              | NR                         | 10.6 mg/dl           | NR                  | NR                        | [13] |
|                                                                    | Stosiek et al. 20/M                | 2.4 mg/dl (low-normal)  | NR           | 304 U/L (high)       | 21.4 ng/ml (N)        | 11pg/ml (10-16)                 | TRP 87%                    | 9.2 mg/dl            | 5.3 pmol/L (normal) | NR                        | [14] |
|                                                                    | O'Neill et al. 3/F                 | 1.1 mmol/L              | NR           | 600 U/L              | NR                    | NR                              | NR                         | 8.4 mg/dl            | NR                  | NR                        | [15] |
|                                                                    | Skokby et al. 1/M                  | 0.54 mmol/L (1.24-1.84) | NR           | 1472 U/L (250-1000)  | NR                    | 91 pmol/L (24-158)              | TRP 37%                    | normal               | normal              | No                        | [16] |
|                                                                    | Carey et al. 7/M                   | 2.6 mg/dl               | NR           | 832 IU/L             | 34.4 ng/ml (15-80)    | 4.3 pg/ml (21-74)               | TmP/GFR 1.58 mg/dl (4-5.9) | 9.3 mg/dl            | 0.9 ng/ml (0.4-1.5) | No                        | [17] |
| Carey et al. 23/F                                                  | 1.2 mg/dl                          | NR                      | 306 IU/L     | 18 ng/ml (15-80)     | 8.7 pg/ml (19-50)     | TmP/GFR 0.64 mg/dl (2.5-4.2)    | 8.8 mg/dl                  | 0.8 ng/nl (0.4-1.5)  | No                  | [17]                      |      |

|                                                                                            | <b>Subject<br/>(author, age<br/>(years), sex)</b> | <b>Serum<br/>phosphate</b> | <b>Serum<br/>FGF23*</b> | <b>Alkaline<br/>phosphatase</b> | <b>25-OH-<br/>Vitamin D</b> | <b>1,25-OH<sub>2</sub>-<br/>Vitamin D</b> | <b>TRP or<br/>TmP/GFR</b> | <b>Serum<br/>calcium</b> | <b>PTH</b>            | <b>Primary<br/>renal<br/>tubulopathy</b> | <b>Ref</b> |
|--------------------------------------------------------------------------------------------|---------------------------------------------------|----------------------------|-------------------------|---------------------------------|-----------------------------|-------------------------------------------|---------------------------|--------------------------|-----------------------|------------------------------------------|------------|
| <b>Subjects<br/>from the<br/>literature<br/>in whom<br/>FGF23<br/>was not<br/>assessed</b> | Sugarman et al. 12/F                              | 2.5 mg/dl (3-5.5)          | NR                      | 210 U/L (30-130)                | NR                          | NR                                        | NR                        | 8.9 mg/dl (9-11)         | NR                    | moderate aminoaciduria                   | [18]       |
|                                                                                            | Moorjani et al. 8/F                               | 2.5 mg/dl                  | NR                      | 350 IU/L                        | NR                          | NR                                        | NR                        | 9.5 mg/dl                | NR                    | trace of amino acids                     | [19]       |
|                                                                                            | Aschinberg et al. 12/M                            | 1.3 mg/dl (2.5-5)          | NR                      | 313 IU/L (20-124)               | NR                          | NR                                        | TRP 35%                   | 9.6 mg/dl (9-11.5)       | 523 pg/ml (275-675)   | No                                       | [20]       |
|                                                                                            | Hosalkar et al. 7/M                               | 1.1 mg/dl (2.5-5)          | NR                      | 340 IU (20-124)                 | 18 ng/ml (15-80)            | 6 pg/ml (20-75)                           | TRP 40%                   | 8.9 mg/dl (9-11.5)       | 0.8ng/ml (0.4-1.5)    | NR                                       | [21]       |
|                                                                                            | Hosalkar et al. 6/M                               | 1.3 mg/dl (2.5-5)          | NR                      | 330 IU (20-124)                 | 12 ng/ml (15-80)            | 9 pg/ml (20-75)                           | TRP 35%                   | 8.8 mg/dl(9-11.5)        | 0.9ng/ml (0.4-1.5)    | NR                                       | [21]       |
|                                                                                            | Hosalkar et al. 3/M                               | 1.8mg/dl (2.5-5)           | NR                      | 210 IU (20-124)                 | 14 ng/ml (15-80)            | 11 pg/ml (20-75)                          | TRP 46%                   | 9.1 mg/dl (9-11.5)       | 0.5ng/ml (0.4-1.5)    | NR                                       | [21]       |
|                                                                                            | Rustin et al. 35/M                                | Low/normalized             | NR                      | NR                              | NR                          | NR                                        | NR                        | normal                   | normal                | NR                                       | [22]       |
|                                                                                            | Sukkhoja et al. 4/F                               | 0.6mmol/L (1.2-1.8)        | NR                      | 2877 (169-372 U/L)              | 61nmol/L (>50)              | NR                                        | TRP 75%                   | 9.2mg/dl                 | 12.5pmol/l (3.7-15.9) | NR                                       | [23]       |
|                                                                                            | Shahgholi et al. newborn/F                        | 1.9mg/dl (3.5-6)           | NR                      | 3300 U/L (45-300)               | normal                      | NR                                        | NR                        | normal                   | NR                    | NR                                       | [24]       |
|                                                                                            | de Morais et al. 9/F                              | LOW                        | NR                      | 1630 U/L (175-420)              | normal                      | NR                                        | NR                        | normal                   | normal                | NR                                       | [25]       |
|                                                                                            | Feldelmann et al. 19/F                            | 0.43 mmol/L (1.11-1.5)     | NR                      | 107 U/L (30-90)                 | 86ng/ml (5-70)              | 26 pg/nl (15-20)                          | TRP 51%                   | normal                   | 0.15ng/ml (<0.5)      | normal                                   | [26]       |
|                                                                                            | Shieh et al. 9/M                                  | 1.3mg/dl                   | NR                      | NR                              | NR                          | NR                                        | 67%                       | normal                   | 0.78ng/ml (0.22-0.66) | NR                                       | [27]       |

|                                                                                                | <b>Subject<br/>(author, age<br/>(years), sex)</b> | <b>Serum<br/>phosphate</b> | <b>Serum<br/>FGF23*</b> | <b>Alkaline<br/>phosphatase</b> | <b>25-OH-<br/>Vitamin D</b> | <b>1,25-OH<sub>2</sub>-<br/>Vitamin D</b> | <b>TRP or<br/>TmP/GFR</b>                                 | <b>Serum<br/>calcium</b> | <b>PTH</b>                | <b>Primary<br/>renal<br/>tubulopathy</b> | <b>Ref</b> |
|------------------------------------------------------------------------------------------------|---------------------------------------------------|----------------------------|-------------------------|---------------------------------|-----------------------------|-------------------------------------------|-----------------------------------------------------------|--------------------------|---------------------------|------------------------------------------|------------|
| <b>Subjects<br/>from the<br/>literature<br/>in whom<br/>FGF23<br/>was not<br/>assessed</b>     | Zutt et al. 15-<br>52/F                           | low/<br>normalized         | NR                      | high/<br>normalized             | NR                          | NRA                                       | low/<br>normalized                                        | normal                   | NR                        | normal                                   | [28]       |
|                                                                                                | Saraswat et<br>al. 22/M                           | 2.4mg/dl<br>(2.5-4)        | NR                      | 46 U/dl (5-14)                  | NR                          | NR                                        | phosphaturia                                              | 7.8mg/dl<br>(8-11)       | normal                    | NR                                       | [29]       |
|                                                                                                | Bouthors<br>52/M                                  | 0.67mmol/l                 | NR                      | normal                          | NR                          | NR                                        | 76%                                                       | normal                   | normal                    | NR                                       | [30]       |
|                                                                                                | Gathwala et<br>al. 6/M                            | 2.6mg/dl                   | NR                      | 1976 U/L                        | normal                      | NR                                        | phosphate<br>urinary<br>excretion<br>700mg/d<br>(100-300) | 8.7mg/dl                 | normal                    | normal                                   | [31]       |
|                                                                                                | John et al.<br>7/M                                | 1.8mg/dl                   | NR                      | 982 U/L                         | NR                          | NR                                        | TmP/GFR<br>0.5mg/dl                                       | 9.6mg/dl                 | NR                        | normal                                   | [32]       |
|                                                                                                | Klein et al.<br>2/M                               | 2.5mg/dl                   | NR                      |                                 | 32.6 ng/ml<br>(normal)      | 21.6pg/ml<br>(normal)                     | 79%                                                       | normal                   | 35pg/ml<br>(normal)       | NR                                       | [33]       |
|                                                                                                | Sanmanechai<br>et al. 7/M                         | 0.77mmol/L<br>(1.19-1.8)   | NR                      | 630U/L(145-<br>420)             |                             |                                           | 64%                                                       | 2.22mmol/L<br>(2.2-2.7)  | 8.38pmol/l<br>(0.95-6.84) | normal                                   | [34]       |
| <b>Subjects<br/>with no<br/>reported<br/>mineral<br/>anomalies<br/>or no labs<br/>reported</b> | Cabanillas et<br>al. 26/M                         | normal                     | normal                  | normal                          | NR                          | normal                                    | NR                                                        | normal                   | normal                    | NR                                       | [35]       |
|                                                                                                | Pierini et al.<br>9/M                             | 4.9mg/dl<br>normal         | NR                      | NR                              | NR                          | NR                                        | NR                                                        | 9.5mg/dl<br>(normal)     | NR                        | NR                                       | [36]       |
|                                                                                                | Kaplan et a.<br>14/F                              | NR                         | NR                      | NR                              | NR                          | NR                                        | NR                                                        | normal                   | normal                    | NR                                       | [37]       |
|                                                                                                | Grun 13/M                                         | normal                     | NR                      | NR                              | NR                          | NR                                        | NR                                                        | normal                   | NR                        | NR                                       | [38]       |

Abbreviations: NR: Not reported, TRP: renal tubular reabsorption of phosphate; TmP/GFR: Tubular maximum Phosphate Reabsorption per Glomerular Filtration

|                                                                                                | Subject<br>(CSHS# or<br>author, age<br>(years), sex) | Serum<br>phosphate | Serum<br>FGF23* | Alkaline<br>phosphatase | 25-OH-<br>Vitamin D | Calcitriol | TRP or<br>TmP/GFR | Serum<br>calcium | PTH | Primary<br>renal<br>tubulopathy | Ref  |
|------------------------------------------------------------------------------------------------|------------------------------------------------------|--------------------|-----------------|-------------------------|---------------------|------------|-------------------|------------------|-----|---------------------------------|------|
| <b>Subjects<br/>with no<br/>reported<br/>mineral<br/>anomalies<br/>or no labs<br/>reported</b> | Camacho et<br>al. 18/M                               | NR                 | NR              | 544 U/L (30-<br>115)    | NR                  | NR         | NR                | NR               | NR  | NR                              | [39] |
|                                                                                                | Bouwes 19/F                                          | NR                 | NR              | NR                      | NR                  | NR         | NR                | NR               | NR  | NR                              | [40] |
|                                                                                                | Vidaurre et<br>al. x<br>3patients                    | NR                 | NR              | NR                      | NR                  | NR         | NR                | NR               | NR  | NR                              | [41] |
|                                                                                                | Yu e tal. 9/M                                        | NR                 | NR              | NR                      | NR                  | NR         | NR                | NR               | NR  | NR                              | [42] |

Normal ranges for serum phosphate in our cohort are adjusted to the age of the subject.

Serum FGF23 values are displayed as intact (pg/ml) or total value (intact plus C-terminal fragments) RU/ml.

Normal ranges for biochemical parameters in subjects from the literature are displayed as reported.

## REFERENCES

1. Lim, Y.H., et al., *Multilicage somatic activating mutations in HRAS and NRAS cause mosaic cutaneous and skeletal lesions, elevated FGF23 and hypophosphatemia*. Hum Mol Genet, 2014. **23**(2): p. 397-407.
2. Narazaki, R., et al., *Linear nevus sebaceous syndrome with hypophosphatemic rickets with elevated FGF-23*. Pediatr Nephrol, 2012. **27**(5): p. 861-3.
3. Sethi, S.K., P. Hari, and A. Bagga, *Elevated FGF-23 and parathormone in linear nevus sebaceous syndrome with resistant rickets*. Pediatr Nephrol, 2010. **25**(8): p. 1577-8.
4. Hoffman, W.H., et al., *Elevated fibroblast growth factor-23 in hypophosphatemic linear nevus sebaceous syndrome*. Am J Med Genet A, 2005. **134**(3): p. 233-6.
5. Aggarwal, S., et al., *Hypophosphatemic rickets associated with giant hairy nevus*. Indian J Endocrinol Metab, 2013. **17**(Suppl 1): p. S188-90.
6. Avitan-Hersh, E., et al., *Postzygotic HRAS mutation causing both keratinocytic epidermal nevus and thymoma and associated with bone dysplasia and hypophosphatemia due to elevated FGF23*. J Clin Endocrinol Metab, 2014. **99**(1): p. E132-6.
7. Moreira, A.I., et al., *Epidermal nevus syndrome associated with hypophosphatemic rickets*. Dermatol Online J, 2010. **16**(9): p. 14.
8. Kishida, E.S., et al., *Epidermal nevus syndrome associated with adnexal tumors, spitz nevus, and hypophosphatemic vitamin D-resistant rickets*. Pediatr Dermatol, 2005. **22**(1): p. 48-54.
9. Chou, Y.Y., et al., *Hypophosphatemic rickets associated with epidermal nevus syndrome and giant hairy nevus*. J Pediatr Endocrinol Metab, 2005. **18**(1): p. 93-5.
10. Olivares, J.L., et al., *Epidermal naevus syndrome and hypophosphatemic rickets: description of a patient with central nervous system anomalies and review of the literature*. Eur J Pediatr, 1999. **158**(2): p. 103-7.
11. Ivker, R., S.D. Resnick, and R.A. Skidmore, *Hypophosphatemic vitamin D-resistant rickets, precocious puberty, and the epidermal nevus syndrome*. Arch Dermatol, 1997. **133**(12): p. 1557-61.
12. Oranje, A.P., et al., *Solomon's epidermal nevus syndrome (type: linear nevus sebaceous) and hypophosphatemic vitamin D-resistant rickets*. Arch Dermatol, 1994. **130**(9): p. 1167-71.

13. Tokatli, A., T. Coskun, and I. Ozalp, *Hypophosphatemic vitamin-D resistant rickets associated with epidermal nevus syndrome. A case report.* Turk J Pediatr, 1997. **39**(2): p. 247-51.
14. Stosiek, N., et al., *Extensive linear epidermal nevus associated with hemangiomas of bones and vitamin-D-resistant rickets.* Dermatology, 1994. **189**(3): p. 278-82.
15. O'Neill, E.M., *Linear sebaceous naevus syndrome with oncogenic rickets and diffuse pulmonary angiomas.* J R Soc Med, 1993. **86**(3): p. 177-8.
16. Skovby, F., E. Svejgaard, and J. Moller, *Hypophosphatemic rickets in linear sebaceous nevus sequence.* J Pediatr, 1987. **111**(6 Pt 1): p. 855-7.
17. Carey, D.E., et al., *Hypophosphatemic rickets/osteomalacia in linear sebaceous nevus syndrome: a variant of tumor-induced osteomalacia.* J Pediatr, 1986. **109**(6): p. 994-1000.
18. Sugarman, G.I. and W.B. Reed, *Two unusual neurocutaneous disorders with facial cutaneous signs.* Arch Neurol, 1969. **21**(3): p. 242-7.
19. Moorjani, R. and D.G. Shaw, *Feuerstein and Mims syndrome with resistant rickets.* Pediatr Radiol, 1976. **5**(2): p. 120-2.
20. Aschinberg, L.C., et al., *Vitamin D-resistant rickets associated with epidermal nevus syndrome: demonstration of a phosphaturic substance in the dermal lesions.* J Pediatr, 1977. **91**(1): p. 56-60.
21. Hosalkar, H.S., et al., *Linear sebaceous naevus syndrome and resistant rickets.* J Bone Joint Surg Br, 2003. **85**(4): p. 578-83.
22. Rustin, M.H., et al., *Polyostotic fibrous dysplasia associated with extensive linear epidermal naevi.* Clin Exp Dermatol, 1989. **14**(5): p. 371-5.
23. Sukkhohaiwaratkul, D., P. Mahachoklertwattana, and P. Poomthavorn, *Epidermal nevus syndrome with hypophosphatemic rickets in a young girl.* J Paediatr Child Health, 2014. **50**(7): p. 566-9.
24. Shahgholi, E., et al., *Congenital rhabdomyosarcoma, central precocious puberty, hemihypertrophy and hypophosphatemic rickets associated with epidermal nevus syndrome.* J Pediatr Endocrinol Metab, 2011. **24**(11-12): p. 1063-6.
25. de Morais, O.O., et al., *Phacomatosis pigmentokeratolica--a patient with hypophosphatemic rickets.* Skinmed, 2013. **11**(2): p. 125-8.
26. Feldmann, J.L., et al., *[Solomon's syndrome associated with fibrous dysplasia of bone and vitamin-resistant rickets].* Rev Rhum Mal Osteoartic, 1990. **57**(12): p. 881-4.
27. Shieh, C.C. and P.J. Wang, *Giant nevocellular nevi with rickets and brainstem tumor.* Pediatr Neurol, 1991. **7**(6): p. 452-4.
28. Zutt, M., et al., *Schimmelpenning-Feuerstein-Mims syndrome with hypophosphatemic rickets.* Dermatology, 2003. **207**(1): p. 72-6.
29. Saraswat, A., et al., *Phacomatosis pigmentokeratolica associated with hypophosphatemic vitamin D-resistant rickets: improvement in phosphate homeostasis after partial laser ablation.* Br J Dermatol, 2003. **148**(5): p. 1074-6.
30. Bouthors, J., et al., *Phacomatosis pigmentokeratolica associated with hypophosphatemic rickets, pheochromocytoma and multiple basal cell carcinomas.* Br J Dermatol, 2006. **155**(1): p. 225-6.
31. Gathwala, G., et al., *Giant congenital melanocytic nevi: a rare association with hypophosphatemic rickets.* Indian J Pediatr, 2013. **80**(5): p. 430-1.
32. John, M. and N.S. Shah, *Hypophosphatemic rickets with epidermal nevus syndrome.* Indian Pediatr, 2005. **42**(6): p. 611-2.
33. Klein, G.L., et al., *Congenital linear sebaceous nevus syndrome.* J Bone Miner Res, 1998. **13**(6): p. 1056-7.
34. Sanmaneechai, O., W. Wisuthsarewong, and P. Sawathiparnich, *Epidermal Nevus Syndrome Presenting as Hypophosphatemic Rickets.* Endocrinologist, 2006. **16**(3): p. 145-149.
35. Cabanillas, M., et al., *Epidermal nevus syndrome associated with polyostotic fibrous dysplasia, CNS lipoma, and aplasia cutis.* Dermatol Online J, 2009. **15**(10): p. 7.
36. Pierini, A.M., J.P. Ortonne, and D. Floret, *[Cutaneous manifestations of McCune-Albright syndrome: report of a case (author's transl)].* Ann Dermatol Venereol, 1981. **108**(12): p. 969-76.
37. Kaplan, I., A. Metzker, and S. Calderon, *Epidermal nevus syndrome with maxillary involvement.* Int J Oral Maxillofac Surg, 1993. **22**(5): p. 298-300.
38. Grun, G. and M.F. Didier, *[Albright's syndrome (apropos of 2 cases)].* Bull Soc Fr Dermatol Syphiligr, 1972. **79**(2): p. 184-5.
39. Camacho Martinez, F. and J.C. Moreno Gimenez, *[Epidermal nevus syndrome (of Solomon, Fretzin and Dewald)].* Ann Dermatol Venereol, 1985. **112**(2): p. 143-7.
40. Bouwes Bavinck, J.N. and J.J.P. van de Kamp, *Organoid naevus phacomatosis: Schimmelpenning-Feuerstein-Mims Syndrome.* Br J Dermatol, 1985. **113**: p. 491-492.

41. Vidaurri-de la Cruz, H., et al., *Epidermal nevus syndromes: clinical findings in 35 patients*. *Pediatr Dermatol*, 2004. **21**(4): p. 432-9.
42. Yu, A.C., et al., *Epidermal naevus syndrome associated with polyostotic fibrous dysplasia and central precocious puberty*. *Eur J Pediatr*, 1995. **154**(2): p. 102-4.
43. Abkevich, V., et al., *Predisposition locus for major depression at chromosome 12q22-12q23.2*. *Am J Hum Genet*, 2003. **73**(6): p. 1271-81.
