# Supplementary material
Source: PubMed Central journal article supplement (PMC6908308)
Supplement: NIHMS912318-supplement-supplement_3.pdf [file NIHMS912318-supplement-supplement_3.pdf]

### Online Resource 3. Sex and Ethnicity in CSHS published reports

| Sex            |             |                  |
|----------------|-------------|------------------|
| Male           | 31/51 (61%) |                  |
| Female         | 20/51 (39%) |                  |
| Ethnicity      |             | References       |
| Caucasian      | 22/51 (43%) | [1-22]           |
| Asian          | 8/51 (16%)  | [9, 23-29]       |
| South Asian    | 5/51 (10%)  | [30-34]          |
| Middle Eastern | 5/51 (10%)  | [6, 35-38]       |
| Latin American | 4/51 (8%)   | [39, 40]         |
| Black          | 2/51 (4%)   | CSHS104, [9, 41] |
| Unclear        | 5/51 (10%)  | [42-45]          |

1. Aschinberg, L.C., et al., *Vitamin D-resistant rickets associated with epidermal nevus syndrome: demonstration of a phosphaturic substance in the dermal lesions*. J Pediatr, 1977. **91**(1): p. 56-60.
2. Bouthors, J., et al., *Phacomatosis pigmentokeratolica associated with hypophosphataemic rickets, pheochromocytoma and multiple basal cell carcinomas*. Br J Dermatol, 2006. **155**(1): p. 225-6.
3. Bouwes Bavinck, J.N. and J.J.P. van de Kamp, *Organoid naevus phacomatosis: Schimmelpenning-Feuerstein-Mims Syndrome*. Br J Dermatol, 1985. **113**: p. 491-492.
4. Cabanillas, M., et al., *Epidermal nevus syndrome associated with polyostotic fibrous dysplasia, CNS lipoma, and aplasia cutis*. Dermatol Online J, 2009. **15**(10): p. 7.
5. Camacho Martinez, F. and J.C. Moreno Gimenez, [*Epidermal nevus syndrome (of Solomon, Fretzin and Dewald)*]. Ann Dermatol Venereol, 1985. **112**(2): p. 143-7.
6. Carey, D.E., et al., *Hypophosphatemic rickets/osteomalacia in linear sebaceous nevus syndrome: a variant of tumor-induced osteomalacia*. J Pediatr, 1986. **109**(6): p. 994-1000.
7. Grun, G. and M.F. Didier, [*Albright's syndrome (apropos of 2 cases)*]. Bull Soc Fr Dermatol Syphiligr, 1972. **79**(2): p. 184-5.
8. Heike, C.L., et al., *Skeletal changes in epidermal nevus syndrome: does focal bone disease harbor clues concerning pathogenesis?* Am J Med Genet A, 2005. **139A**(2): p. 67-77.
9. Hosalkar, H.S., et al., *Linear sebaceous naevus syndrome and resistant rickets*. J Bone Joint Surg Br, 2003. **85**(4): p. 578-83.

10. Ivker, R., S.D. Resnick, and R.A. Skidmore, *Hypophosphatemic vitamin D-resistant rickets, precocious puberty, and the epidermal nevus syndrome*. Arch Dermatol, 1997. **133**(12): p. 1557-61.
11. Kaplan, I., A. Metzker, and S. Calderon, *Epidermal nevus syndrome with maxillary involvement*. Int J Oral Maxillofac Surg, 1993. **22**(5): p. 298-300.
12. Kishida, E.S., et al., *Epidermal nevus syndrome associated with adnexal tumors, spitz nevus, and hypophosphatemic vitamin D-resistant rickets*. Pediatr Dermatol, 2005. **22**(1): p. 48-54.
13. Klein, G.L., et al., *Congenital linear sebaceous nevus syndrome*. J Bone Miner Res, 1998. **13**(6): p. 1056-7.
14. Moreira, A.I., et al., *Epidermal nevus syndrome associated with hypophosphatemic rickets*. Dermatol Online J, 2010. **16**(9): p. 14.
15. Muhle, C., et al., *Skeletal involvement and follow-up in linear nevus sebaceous syndrome*. Eur Radiol, 1998. **8**(4): p. 606-8.
16. Olivares, J.L., et al., *Epidermal naevus syndrome and hypophosphataemic rickets: description of a patient with central nervous system anomalies and review of the literature*. Eur J Pediatr, 1999. **158**(2): p. 103-7.
17. Oranje, A.P., et al., *Solomon's epidermal nevus syndrome (type: linear nevus sebaceous) and hypophosphatemic vitamin D-resistant rickets*. Arch Dermatol, 1994. **130**(9): p. 1167-71.
18. Pierini, A.M., J.P. Ortonne, and D. Floret, [*Cutaneous manifestations of McCune-Albright syndrome: report of a case (author's transl)*]. Ann Dermatol Venereol, 1981. **108**(12): p. 969-76.
19. Rustin, M.H., et al., *Polyostotic fibrous dysplasia associated with extensive linear epidermal naevi*. Clin Exp Dermatol, 1989. **14**(5): p. 371-5.
20. Skovby, F., E. Svejgaard, and J. Moller, *Hypophosphatemic rickets in linear sebaceous nevus sequence*. J Pediatr, 1987. **111**(6 Pt 1): p. 855-7.
21. Yu, A.C., et al., *Epidermal naevus syndrome associated with polyostotic fibrous dysplasia and central precocious puberty*. Eur J Pediatr, 1995. **154**(2): p. 102-4.
22. Zutt, M., et al., *Schimmelpenning-Feuerstein-Mims syndrome with hypophosphatemic rickets*. Dermatology, 2003. **207**(1): p. 72-6.
23. Hoffman, W.H., et al., *Elevated fibroblast growth factor-23 in hypophosphatemic linear nevus sebaceous syndrome*. Am J Med Genet A, 2005. **134**(3): p. 233-6.
24. Moorjani, R. and D.G. Shaw, *Feuerstein and Mims syndrome with resistant rickets*. Pediatr Radiol, 1976. **5**(2): p. 120-2.
25. Narazaki, R., et al., *Linear nevus sebaceous syndrome with hypophosphatemic rickets with elevated FGF-23*. Pediatr Nephrol, 2012. **27**(5): p. 861-3.
26. Sanmaneechai, O., W. Wisuthsarewong, and P. Sawathiparnich, *Epidermal Nevus Syndrome Presenting as Hypophosphatemic Rickets*. Endocrinologist, 2006. **16**(3): p. 145-149.
27. Shieh, C.C. and P.J. Wang, *Giant nevocellular nevi with rickets and brainstem tumor*. Pediatr Neurol, 1991. **7**(6): p. 452-4.
28. Sugarman, G.I. and W.B. Reed, *Two unusual neurocutaneous disorders with facial cutaneous signs*. Arch Neurol, 1969. **21**(3): p. 242-7.

29. Sukkhøjaiwaratkul, D., P. Mahachoklertwattana, and P. Poomthavorn, *Epidermal nevus syndrome with hypophosphatemic rickets in a young girl*. J Paediatr Child Health, 2014. **50**(7): p. 566-9.
30. Aggarwal, S., et al., *Hypophosphatemic rickets associated with giant hairy nevus*. Indian J Endocrinol Metab, 2013. **17**(Suppl 1): p. S188-90.
31. Gathwala, G., et al., *Giant congenital melanocytic nevi: a rare association with hypophosphatemic rickets*. Indian J Pediatr, 2013. **80**(5): p. 430-1.
32. John, M. and N.S. Shah, *Hypophosphatemic rickets with epidermal nevus syndrome*. Indian Pediatr, 2005. **42**(6): p. 611-2.
33. Saraswat, A., et al., *Phacomatosis pigmentokeratolica associated with hypophosphatemic vitamin D-resistant rickets: improvement in phosphate homeostasis after partial laser ablation*. Br J Dermatol, 2003. **148**(5): p. 1074-6.
34. Sethi, S.K., P. Hari, and A. Bagga, *Elevated FGF-23 and parathormone in linear nevus sebaceous syndrome with resistant rickets*. Pediatr Nephrol, 2010. **25**(8): p. 1577-8.
35. Avitan-Hersh, E., et al., *Postzygotic HRAS mutation causing both keratinocytic epidermal nevus and thymoma and associated with bone dysplasia and hypophosphatemia due to elevated FGF23*. J Clin Endocrinol Metab, 2014. **99**(1): p. E132-6.
36. Feldmann, J.L., et al., *[Solomon's syndrome associated with fibrous dysplasia of bone and vitamin-resistant rickets]*. Rev Rhum Mal Osteoartic, 1990. **57**(12): p. 881-4.
37. Shahgholi, E., et al., *Congenital rhabdomyosarcoma, central precocious puberty, hemihypertrophy and hypophosphatemic rickets associated with epidermal nevus syndrome*. J Pediatr Endocrinol Metab, 2011. **24**(11-12): p. 1063-6.
38. Tokatli, A., T. Coskun, and I. Ozalp, *Hypophosphatemic vitamin-D resistant rickets associated with epidermal nevus syndrome. A case report*. Turk J Pediatr, 1997. **39**(2): p. 247-51.
39. de Morais, O.O., et al., *Phacomatosis pigmentokeratolica--a patient with hypophosphatemic rickets*. Skinmed, 2013. **11**(2): p. 125-8.
40. Vidaurri-de la Cruz, H., et al., *Epidermal nevus syndromes: clinical findings in 35 patients*. Pediatr Dermatol, 2004. **21**(4): p. 432-9.
41. Lim, Y.H., et al., *Multilineage somatic activating mutations in HRAS and NRAS cause mosaic cutaneous and skeletal lesions, elevated FGF23 and hypophosphatemia*. Hum Mol Genet, 2014. **23**(2): p. 397-407.
42. Chou, Y.Y., et al., *Hypophosphatemic rickets associated with epidermal nevus syndrome and giant hairy nevus*. J Pediatr Endocrinol Metab, 2005. **18**(1): p. 93-5.
43. Goldblum, J.R. and J.T. Headington, *Hypophosphatemic vitamin D-resistant rickets and multiple spindle and epithelioid nevi associated with linear nevus sebaceous syndrome*. J Am Acad Dermatol, 1993. **29**(1): p. 109-11.
44. O'Neill, E.M., *Linear sebaceous naevus syndrome with oncogenic rickets and diffuse pulmonary angiomas*. J R Soc Med, 1993. **86**(3): p. 177-8.
45. Stosiek, N., et al., *Extensive linear epidermal nevus associated with hemangiomas of bones and vitamin-D-resistant rickets*. Dermatology, 1994. **189**(3): p. 278-82.
