# Supplementary material
Source: PubMed Central journal article supplement (PMC6908308)
Supplement: NIHMS912318-supplement-supplement_5.pdf [file NIHMS912318-supplement-supplement_5.pdf]

Online Resource 5. Extra-osseous/extra-cutaneous abnormalities in CSHS published reports

| Affected system                | Number of subjects | Manifestations                                                                                                                                                                                                                                                                                                                                                                                                                                                                                                                                                                                                                                                                                                                                                                                                                                                                                                                                           |
|--------------------------------|--------------------|----------------------------------------------------------------------------------------------------------------------------------------------------------------------------------------------------------------------------------------------------------------------------------------------------------------------------------------------------------------------------------------------------------------------------------------------------------------------------------------------------------------------------------------------------------------------------------------------------------------------------------------------------------------------------------------------------------------------------------------------------------------------------------------------------------------------------------------------------------------------------------------------------------------------------------------------------------|
| Neurological abnormalities     | 21(45%)            | <ul style="list-style-type: none"> <li>• Intellectual disability/delayed milestones (10 subjects): [1-9]</li> <li>• Bilateral/unilateral ventricular enlargement (7 subjects): [3, 6, 8, 10-13]</li> <li>• Epilepsy/EEG abnormalities (5 subjects): [1, 2, 6, 8, 14]</li> <li>• Brainstem lipomas: (2 subjects): [13, 15]</li> <li>• Macrocephaly: (3 subjects): [13, 16, 17]</li> <li>• Brain atrophy (2 subjects):[8, 11]</li> <li>• Spastic hemiplegia (2 subjects): [8, 14]</li> <li>• Microcephaly (1 subject): [2]</li> <li>• Arachnoid cyst (2 subjects): [11, 18]</li> <li>• Partial third cranial nerve palsy (1 subject): [19].</li> <li>• Hypoplastic right occipital bone (1 subject): [11].</li> <li>• Dyslexia (1 subject): [13]</li> <li>• Nistagmus (1 subject): [15]</li> <li>• Hyperreflexia (1 subject):[15]</li> <li>• Interdigitation of gyri (1 subject): [20]</li> <li>• Brainstem tumor (non-lipoma) (1 subject):[21]</li> </ul> |
| Ophthalmological abnormalities | 12(%)              | <ul style="list-style-type: none"> <li>• Coloboma (5 subjects): [2, 13, 16, 17, 22]</li> <li>• Limbal dermoid (4 subjects): [8, 13, 17, 23]</li> <li>• Strabismus: (3 subjects): [2, 12, 24]</li> <li>• Corneal opacity: (3 subjects): [13, 22, 24]</li> <li>• Dermoid cyst of the eyelid: (1 subject): [16]</li> <li>• Scleral pigmented spots (1 subjects): [25].</li> <li>• Ophthalmoplegia: (1 subject): [24]</li> <li>• Microcornea: (1 subject): [22]</li> <li>• Antimongoloid slant: (1 subject): [6]</li> <li>• Ptosis (1 subject): [6]</li> <li>• Corneal calcification (1 subject): [10]</li> </ul>                                                                                                                                                                                                                                                                                                                                            |
| Affected system                | Number of subjects | Manifestations                                                                                                                                                                                                                                                                                                                                                                                                                                                                                                                                                                                                                                                                                                                                                                                                                                                                                                                                           |
| Hemibody asymmetry             | 12 (%)             | <ul style="list-style-type: none"> <li>• Hemihypertrophy nevi side (4 subjects): [16, 26-28]</li> <li>• Hemihypoplasia nevi side: (5 subjects): [12, 14, 24, 29, 30]</li> <li>• Asymmetrical facies (2 subjects): [6]: side non-specified plus asymmetric dentition, [31]: tongue asymmetry (side non-specified)</li> </ul>                                                                                                                                                                                                                                                                                                                                                                                                                                                                                                                                                                                                                              |

|                                                    |                           |                                                                                                                                                                                                                                                                                                                                                                                   |
|----------------------------------------------------|---------------------------|-----------------------------------------------------------------------------------------------------------------------------------------------------------------------------------------------------------------------------------------------------------------------------------------------------------------------------------------------------------------------------------|
| Cardiovascular abnormalities                       | 4 etc                     | <ul style="list-style-type: none"> <li>Pericardial effusion (1 subjects): [23] (due to pulmonary hemangiomas).</li> <li>Aortic coarctation (1 subjects): [17]</li> <li>Heart valve abnormalities (1 subject): [10](mild aortic regurgitation due to calcification of aortic valve),</li> <li>Flat angioma (face)(1 subject): [26]</li> <li>Lymphedema (1 subject):[17]</li> </ul> |
| Precocious puberty                                 | 4 etc                     | <ul style="list-style-type: none"> <li>Central precocious puberty (3 subjects): [13, 19, 28]</li> <li>Not specified central/perif (1 subject): [24]</li> </ul>                                                                                                                                                                                                                    |
| Thyroid abnormalities                              | 1                         | <ul style="list-style-type: none"> <li>Thyroid medullary carcinoma (1 subject): [32]: diagnosed at 15years, no family history)</li> </ul>                                                                                                                                                                                                                                         |
| Hyper IgE                                          | 2                         | <ul style="list-style-type: none"> <li>[5, 33]</li> </ul>                                                                                                                                                                                                                                                                                                                         |
| Hematological abnormalities                        | 1                         | <ul style="list-style-type: none"> <li>Severe anemia (unknown etiology) (1 subject): [34]</li> </ul>                                                                                                                                                                                                                                                                              |
| Basal cell carcinoma                               | 2                         | <ul style="list-style-type: none"> <li>Diagnose over 50 years: [24, 35]</li> </ul>                                                                                                                                                                                                                                                                                                |
| Hyperparathyroidism                                | 1                         | [33]                                                                                                                                                                                                                                                                                                                                                                              |
| Congenital rhabdomyosarcoma                        | 1                         | [28]                                                                                                                                                                                                                                                                                                                                                                              |
| Testicular abnormalities                           | 1                         | [17]                                                                                                                                                                                                                                                                                                                                                                              |
| Giant cell granuloma of the maxilla                | 1                         | [16]                                                                                                                                                                                                                                                                                                                                                                              |
| Pheocromo-cytoma                                   | 1                         | Detected incidentally at 54 [35]                                                                                                                                                                                                                                                                                                                                                  |
| Thymoma                                            | 1                         | <i>HRAS</i> mutation confirmed in timoma [31]                                                                                                                                                                                                                                                                                                                                     |
| <b>Affected system</b>                             | <b>Number of subjects</b> | <b>Manifestations</b>                                                                                                                                                                                                                                                                                                                                                             |
| Bladder leiomyoma                                  | 1                         | [9]                                                                                                                                                                                                                                                                                                                                                                               |
| NO extra-osseous/extra-cutaneous findings reported | 15*                       | <ul style="list-style-type: none"> <li>[1, 9, 10, 18, 36-43]</li> <li>*Not reported but obvious hemihypoplasia in images: [30]</li> </ul>                                                                                                                                                                                                                                         |

## REFERENCES

- Carey, D.E., et al., *Hypophosphatemic rickets/osteomalacia in linear sebaceous nevus syndrome: a variant of tumor-induced osteomalacia*. J Pediatr, 1986. **109**(6): p. 994-1000.

2. Besser, F.S., *Linear sebaceous naevi with convulsions and mental retardation (Feuerstein-Mims' syndrome), vitamin-D-resistant rickets*. Proc R Soc Med, 1976. **69**(7): p. 518-20.
3. Camacho Martinez, F. and J.C. Moreno Gimenez, [*Epidermal nevus syndrome (of Solomon, Fretzin and Dewald)*]. Ann Dermatol Venereol, 1985. **112**(2): p. 143-7.
4. Feldmann, J.L., et al., [*Solomon's syndrome associated with fibrous dysplasia of bone and vitamin-resistant rickets*]. Rev Rhum Mal Osteoartic, 1990. **57**(12): p. 881-4.
5. Hoffman, W.H., et al., *Elevated fibroblast growth factor-23 in hypophosphatemic linear nevus sebaceous syndrome*. Am J Med Genet A, 2005. **134**(3): p. 233-6.
6. Oranje, A.P., et al., *Solomon's epidermal nevus syndrome (type: linear nevus sebaceous) and hypophosphatemic vitamin D-resistant rickets*. Arch Dermatol, 1994. **130**(9): p. 1167-71.
7. Sanmaneechai, O., W. Wisuthsarewong, and P. Sawathiparnich, *Epidermal Nevus Syndrome Presenting as Hypophosphatemic Rickets*. Endocrinologist, 2006. **16**(3): p. 145-149.
8. Sugarman, G.I. and W.B. Reed, *Two unusual neurocutaneous disorders with facial cutaneous signs*. Arch Neurol, 1969. **21**(3): p. 242-7.
9. Vidaurri-de la Cruz, H., et al., *Epidermal nevus syndromes: clinical findings in 35 patients*. Pediatr Dermatol, 2004. **21**(4): p. 432-9.
10. Hosalkar, H.S., et al., *Linear sebaceous naevus syndrome and resistant rickets*. J Bone Joint Surg Br, 2003. **85**(4): p. 578-83.
11. Olivares, J.L., et al., *Epidermal naevus syndrome and hypophosphataemic rickets: description of a patient with central nervous system anomalies and review of the literature*. Eur J Pediatr, 1999. **158**(2): p. 103-7.
12. Skovby, F., E. Svejgaard, and J. Moller, *Hypophosphatemic rickets in linear sebaceous nevus sequence*. J Pediatr, 1987. **111**(6 Pt 1): p. 855-7.
13. Yu, A.C., et al., *Epidermal naevus syndrome associated with polyostotic fibrous dysplasia and central precocious puberty*. Eur J Pediatr, 1995. **154**(2): p. 102-4.
14. Muhle, C., et al., *Skeletal involvement and follow-up in linear nevus sebaceous syndrome*. Eur Radiol, 1998. **8**(4): p. 606-8.
15. Cabanillas, M., et al., *Epidermal nevus syndrome associated with polyostotic fibrous dysplasia, CNS lipoma, and aplasia cutis*. Dermatol Online J, 2009. **15**(10): p. 7.
16. Kaplan, I., A. Metzker, and S. Calderon, *Epidermal nevus syndrome with maxillary involvement*. Int J Oral Maxillofac Surg, 1993. **22**(5): p. 298-300.
17. Pierini, A.M., J.P. Ortonne, and D. Floret, [*Cutaneous manifestations of McCune-Albright syndrome: report of a case (author's transl)*]. Ann Dermatol Venereol, 1981. **108**(12): p. 969-76.
18. Aggarwal, S., et al., *Hypophosphatemic rickets associated with giant hairy nevus*. Indian J Endocrinol Metab, 2013. **17**(Suppl 1): p. S188-90.
19. Ivker, R., S.D. Resnick, and R.A. Skidmore, *Hypophosphatemic vitamin D-resistant rickets, precocious puberty, and the epidermal nevus syndrome*. Arch Dermatol, 1997. **133**(12): p. 1557-61.
20. John, M. and N.S. Shah, *Hypophosphatemic rickets with epidermal nevus syndrome*. Indian Pediatr, 2005. **42**(6): p. 611-2.
21. Shieh, C.C. and P.J. Wang, *Giant nevocellular nevi with rickets and brainstem tumor*. Pediatr Neurol, 1991. **7**(6): p. 452-4.

22. Bouwes Bavinck, J.N. and J.J.P. van de Kamp, *Organoid naevus phakomatosis: Schimmelpenning-Feuerstein-Mims Syndrome*. Br J Dermatol, 1985. **113**: p. 491-492.
23. O'Neill, E.M., *Linear sebaceous naevus syndrome with oncogenic rickets and diffuse pulmonary angiomas*. J R Soc Med, 1993. **86**(3): p. 177-8.
24. Zutt, M., et al., *Schimmelpenning-Feuerstein-Mims syndrome with hypophosphatemic rickets*. Dermatology, 2003. **207**(1): p. 72-6.
25. de Morais, O.O., et al., *Phacomatosis pigmentokeratolica--a patient with hypophosphatemic rickets*. Skinmed, 2013. **11**(2): p. 125-8.
26. Grun, G. and M.F. Didier, [*Albright's syndrome (apropos of 2 cases)*]. Bull Soc Fr Dermatol Syphiligr, 1972. **79**(2): p. 184-5.
27. Saraswat, A., et al., *Phakomatosis pigmentokeratolica associated with hypophosphatemic vitamin D-resistant rickets: improvement in phosphate homeostasis after partial laser ablation*. Br J Dermatol, 2003. **148**(5): p. 1074-6.
28. Shahgholi, E., et al., *Congenital rhabdomyosarcoma, central precocious puberty, hemihypertrophy and hypophosphatemic rickets associated with epidermal nevus syndrome*. J Pediatr Endocrinol Metab, 2011. **24**(11-12): p. 1063-6.
29. Heike, C.L., et al., *Skeletal changes in epidermal nevus syndrome: does focal bone disease harbor clues concerning pathogenesis?* Am J Med Genet A, 2005. **139A**(2): p. 67-77.
30. Klein, G.L., et al., *Congenital linear sebaceous nevus syndrome*. J Bone Miner Res, 1998. **13**(6): p. 1056-7.
31. Avitan-Hersh, E., et al., *Postzygotic HRAS mutation causing both keratinocytic epidermal nevus and thymoma and associated with bone dysplasia and hypophosphatemia due to elevated FGF23*. J Clin Endocrinol Metab, 2014. **99**(1): p. E132-6.
32. Rustin, M.H., et al., *Polyostotic fibrous dysplasia associated with extensive linear epidermal naevi*. Clin Exp Dermatol, 1989. **14**(5): p. 371-5.
33. Sethi, S.K., P. Hari, and A. Bagga, *Elevated FGF-23 and parathormone in linear nevus sebaceous syndrome with resistant rickets*. Pediatr Nephrol, 2010. **25**(8): p. 1577-8.
34. Srinivas, U.M. and K.L. Tourani, *Epidermal nevus syndrome with hypophosphatemic renal rickets with hypercalciuria: a bonemarrow diagnosis*. Int J Hematol, 2008. **88**(2): p. 125-6.
35. Bouthors, J., et al., *Phacomatosis pigmentokeratolica associated with hypophosphatemic rickets, pheochromocytoma and multiple basal cell carcinomas*. Br J Dermatol, 2006. **155**(1): p. 225-6.
36. Aschinberg, L.C., et al., *Vitamin D-resistant rickets associated with epidermal nevus syndrome: demonstration of a phosphaturic substance in the dermal lesions*. J Pediatr, 1977. **91**(1): p. 56-60.
37. Chou, Y.Y., et al., *Hypophosphatemic rickets associated with epidermal nevus syndrome and giant hairy nevus*. J Pediatr Endocrinol Metab, 2005. **18**(1): p. 93-5.
38. Gathwala, G., et al., *Giant congenital melanocytic nevi: a rare association with hypophosphatemic rickets*. Indian J Pediatr, 2013. **80**(5): p. 430-1.
39. Goldblum, J.R. and J.T. Headington, *Hypophosphatemic vitamin D-resistant rickets and multiple spindle and epithelioid nevi associated with linear nevus sebaceous syndrome*. J Am Acad Dermatol, 1993. **29**(1): p. 109-11.

40. Kishida, E.S., et al., *Epidermal nevus syndrome associated with adnexal tumors, spitz nevus, and hypophosphatemic vitamin D-resistant rickets*. *Pediatr Dermatol*, 2005. **22**(1): p. 48-54.
41. Moreira, A.I., et al., *Epidermal nevus syndrome associated with hypophosphatemic rickets*. *Dermatol Online J*, 2010. **16**(9): p. 14.
42. Stosiek, N., et al., *Extensive linear epidermal nevus associated with hemangiomas of bones and vitamin-D-resistant rickets*. *Dermatology*, 1994. **189**(3): p. 278-82.
43. Sukkhajaiwaratkul, D., P. Mahachoklertwattana, and P. Poomthavorn, *Epidermal nevus syndrome with hypophosphatemic rickets in a young girl*. *J Paediatr Child Health*, 2014. **50**(7): p. 566-9.
