# Supplementary material
Source: PubMed Central journal article supplement (PMC6908308)
Supplement: NIHMS912318-supplement-supplement_6.pdf [file NIHMS912318-supplement-supplement_6.pdf]

Online Resource 6. Tumors identified in CSHS published reports

| Benign neoplasms                                                                                                                                                                                                                                                                                                                                                                                                                                                              | Malignant neoplasms                                                                                                                                                                                                                                 |
|-------------------------------------------------------------------------------------------------------------------------------------------------------------------------------------------------------------------------------------------------------------------------------------------------------------------------------------------------------------------------------------------------------------------------------------------------------------------------------|-----------------------------------------------------------------------------------------------------------------------------------------------------------------------------------------------------------------------------------------------------|
| <ul style="list-style-type: none"> <li>• Pheocromocytoma [1]</li> <li>• Thymoma [2]</li> <li>• Giant cell granuloma [3]</li> <li>• Bladder leiomyoma [4]</li> <li>• CNS lipoma (x 2) [5, 6]</li> <li>• Ocular dermoids (x 5) [3, 6-9]</li> <li>• Syringocystoadenoma papilliferum (x 3) [10-12]</li> <li>• Benign vascular tumors               <ul style="list-style-type: none"> <li>- Pulmonary hemangiomas [7]</li> <li>- Facial flat angioma [13]</li> </ul> </li> </ul> | <ul style="list-style-type: none"> <li>• Congenital rhabdomyosarcoma [14]</li> <li>• Malignant CNS tumor (histology not revealed) [15]</li> <li>• Medullary carcinoma of the thyroid [16]</li> <li>• Basal cell carcinoma (x 2): [1, 12]</li> </ul> |

1. Bouthors, J., et al., *Phacomatosis pigmentokeratolica associated with hypophosphataemic rickets, pheochromocytoma and multiple basal cell carcinomas*. Br J Dermatol, 2006. **155**(1): p. 225-6.
2. Avitan-Hersh, E., et al., *Postzygotic HRAS mutation causing both keratinocytic epidermal nevus and thymoma and associated with bone dysplasia and hypophosphatemia due to elevated FGF23*. J Clin Endocrinol Metab, 2014. **99**(1): p. E132-6.
3. Kaplan, I., A. Metzker, and S. Calderon, *Epidermal nevus syndrome with maxillary involvement*. Int J Oral Maxillofac Surg, 1993. **22**(5): p. 298-300.
4. Vidaurri-de la Cruz, H., et al., *Epidermal nevus syndromes: clinical findings in 35 patients*. Pediatr Dermatol, 2004. **21**(4): p. 432-9.
5. Cabanillas, M., et al., *Epidermal nevus syndrome associated with polyostotic fibrous dysplasia, CNS lipoma, and aplasia cutis*. Dermatol Online J, 2009. **15**(10): p. 7.
6. Yu, A.C., et al., *Epidermal naevus syndrome associated with polyostotic fibrous dysplasia and central precocious puberty*. Eur J Pediatr, 1995. **154**(2): p. 102-4.
7. O'Neill, E.M., *Linear sebaceous naevus syndrome with oncogenic rickets and diffuse pulmonary angiomas*. J R Soc Med, 1993. **86**(3): p. 177-8.
8. Pierini, A.M., J.P. Ortonne, and D. Floret, *[Cutaneous manifestations of McCune-Albright syndrome: report of a case (author's transl)]*. Ann Dermatol Venereol, 1981. **108**(12): p. 969-76.
9. Sugarman, G.I. and W.B. Reed, *Two unusual neurocutaneous disorders with facial cutaneous signs*. Arch Neurol, 1969. **21**(3): p. 242-7.
10. Kishida, E.S., et al., *Epidermal nevus syndrome associated with adnexal tumors, spitz nevus, and hypophosphatemic vitamin D-resistant rickets*. Pediatr Dermatol, 2005. **22**(1): p. 48-54.
11. Olivares, J.L., et al., *Epidermal naevus syndrome and hypophosphataemic rickets: description of a patient with central nervous system anomalies and review of the literature*. Eur J Pediatr, 1999. **158**(2): p. 103-7.
12. Zutt, M., et al., *Schimmelpenning-Feuerstein-Mims syndrome with hypophosphatemic rickets*. Dermatology, 2003. **207**(1): p. 72-6.

13. Grun, G. and M.F. Didier, [*Albright's syndrome (apropos of 2 cases)*]. Bull Soc Fr Dermatol Syphiligr, 1972. **79**(2): p. 184-5.
14. Shahgholi, E., et al., *Congenital rhabdomyosarcoma, central precocious puberty, hemihypertrophy and hypophosphatemic rickets associated with epidermal nevus syndrome*. J Pediatr Endocrinol Metab, 2011. **24**(11-12): p. 1063-6.
15. Shieh, C.C. and P.J. Wang, *Giant nevocellular nevi with rickets and brainstem tumor*. Pediatr Neurol, 1991. **7**(6): p. 452-4.
16. Rustin, M.H., et al., *Polyostotic fibrous dysplasia associated with extensive linear epidermal naevi*. Clin Exp Dermatol, 1989. **14**(5): p. 371-5.
